# Supplementary material for: Terpyridinyl dibenzo[b,d]furan and dibenzo[b,d]thiophene based tetrameric bismetallo-macrocycles
Source: Royal Society of Chemistry journal article supplement (doi:10.1039/c5ra21307j), 2016-01-01
Supplement: c5ra21307j1.pdf [file c5ra21307j1.pdf]

## Supporting Information

### Terpyridinyl Dibenzo[b,d]furan and Dibenzo[b,d]thiophene based Tetrameric *Bismetallo*-macrocycles

Wu Tun, Guo Yuan, Die Liu, Meng Wang, Yiming Li, Mingzhao Chen, Hongwen  
Tao, Pingshan Wang\*

| Table of contents                                                                                                                          | page     |
|--------------------------------------------------------------------------------------------------------------------------------------------|----------|
| General procedures and experimental details.....                                                                                           | S2- S5   |
| <sup>1</sup> H-NMR spectra.....                                                                                                            | S5-S7    |
| 2D COSY-NMR.....                                                                                                                           | S7-      |
| S9                                                                                                                                         |          |
| <sup>13</sup> C-NMR spectra.....                                                                                                           | S10      |
| <sup>31</sup> P-NMR spectra.....                                                                                                           | S11      |
| MS spectra of Ligands.....                                                                                                                 | S11-S12  |
| Isotope Pattern.....                                                                                                                       | S13- S16 |
| Partial isotopic patterns of ESI-TOF-MS spectra for [(L2Fe) <sub>5</sub> ] <sup>9+</sup> and<br>[(L2Fe) <sub>5</sub> ] <sup>6+</sup> ..... | S17      |
| UV-vis spectra.....                                                                                                                        | S18      |
| Cyclic voltammograms of the complexes <b>T5</b> and <b>T6</b> .....                                                                        | S19      |
| Energy-minimized structures from molecular modeling.....                                                                                   | S20      |
| Reference.....                                                                                                                             | S20      |

**General Procedures:** All the chemicals and solvents were purchased from Sigma Aldrich, MERCK or Energy-chemical, and used without further purification. 2,8-dibromodibenzo[b,d]thiophene,<sup>1</sup> 2,8-dibromodibenzo[b,d]furan<sup>1</sup> and (4-([2,2':6',2''-terpyridin]-4'-yl)phenyl) boronic acid<sup>2</sup> and was prepared as described in the literature. Normal phase purifications were carried out using neutral aluminum oxide (200-300 mesh). TLC was carried out using Merck Aluminium Oxide 150 F254, neutral. <sup>1</sup>H-NMR spectra was recorded on Bruker Avance 400Hz and 500 Hz NMR spectrometers, and chemical shifts were reported in parts per million (ppm) relative to Si(CH<sub>3</sub>)<sub>4</sub> as external standard. Analytical characterization was performed on a Q-TOF mass spectrometer with an ESI probe which produced by XEVO.

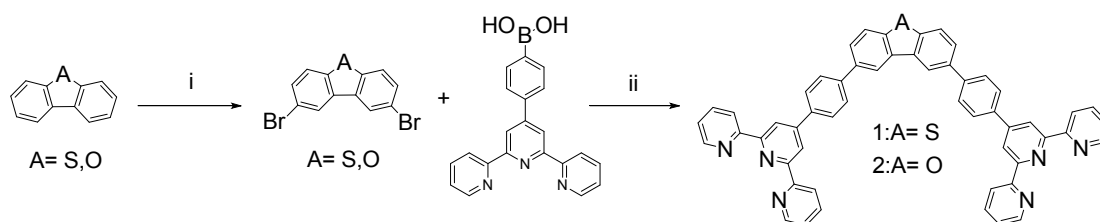

**Scheme 1. Synthetic Route of the ligand (i): AcOH, Br<sub>2</sub>; (ii) Pd<sup>0</sup>(PPh<sub>3</sub>)<sub>4</sub>, NaOH (aqueous, 1 M), THF.**

**General Suzuki-Coupling Procedure:** To a 3-necked round bottom flask, the initial aryl halide, 4'-(4-boronatophenyl)-2,2':6',2''-terpyridine (1.1 equiv. per halide), NaOH (aqueous, 1M) (3 equiv. per halide), and THF were added. The system was freeze-pump-thawed and backfilled with argon or nitrogen, after which Pd(PPh<sub>3</sub>)<sub>4</sub> (6 mol% per halide) was added. The biphasic system was refluxed for 24 h resulting in a green solution. The solvent was removed under vacuum, then washed with water. The aqueous layer was extracted with CHCl<sub>3</sub> (3 times), the combined extract was dried (MgSO<sub>4</sub>), and concentrated in vacuo to give a residue, which was column chromatographed (Al<sub>2</sub>O<sub>3</sub>) eluting with CH<sub>2</sub>Cl<sub>2</sub> to give pure bis(terpyridine) ligand, as white solid.

**Compound L1:** Using the general Suzuki-Coupling procedure, the following were used in specified quantities: 2,8-dibromodibenzo[b,d]thiophene (513 mg, 1.5 mmol), 4'-(4-boronatophenyl)-2,2':6',2''-terpyridine (1.16 g, 3.3 mmol), NaOH (aqueous, 1M) (360 mg, 9 mmol), Pd(PPh<sub>3</sub>)<sub>4</sub> (207 mg, 0.18 mmol), THF (80 mL); Yield: 778 mg (65%); <sup>1</sup>H-NMR(500MHz, ppm, CDCl<sub>3</sub>): δ 8.82 (s, 4H, Tpy-*H*<sup>3',5'</sup>), 8.76-8.75 (d, *J* = 5.0 Hz, 4H, Tpy-*H*<sup>6,6''</sup>), 8.70-8.69 (d, *J* = 5.0 Hz, 4H, Tpy-*H*<sup>3,3''</sup>), 8.53-8.52 (d, 2H, *J* = 5.0, *H*<sup>c</sup>), 8.08-8.06 (d, 4H, *J* = 10.0, Ar-*H*<sup>f</sup>), 7.98-7.97 (d, 2H, 2H, *H*<sup>a</sup>), 7.91-7.89 (m, 8H, Tpy-*H*<sup>4,4''</sup>, Ar-*H*<sup>e</sup>), 7.82-7.80(m, 2H, *H*<sup>b</sup>), 7.41-7.38(m, 4H, Tpy-*H*<sup>5,5''</sup>); <sup>13</sup>C-NMR(125MHz, ppm, CDCl<sub>3</sub>): 156.52, 156.32, 156.03, 149.80, 149.17, 141.90, 137.14, 136.69, 135.80, 127.89, 127.84, 126.88, 124.88, 123.85, 121.42, 119.35, 118.73, 112.07; LC-MS: 801.6 [M+H] (Calcd. 800.0). m.p. 126-130 °C.

**Compound L2:** 2,8-dibromodibenzo[b,d]furan (489 mg, 1.5 mmol), 4'-(4-boronatophenyl)-2,2':6'2''-terpyridine (1.16 g, 3.3 mmol), NaOH (aqueous, 1M) (360 mg, 9 mmol), Pd(PPh<sub>3</sub>)<sub>4</sub> (207 mg, 0.18 mmol), THF (80 mL); Yield: 857 mg (73%); <sup>1</sup>H-NMR(500MHz, ppm, CDCl<sub>3</sub>): δ 8.85 (s, 4H, Tpy-*H*<sup>3',5'</sup>), 8.79-8.78 (d, *J* = 5.0 Hz, 4H, Tpy-*H*<sup>6,6''</sup>), 8.73-8.71 (d, *J* = 10.0 Hz, 4H, Tpy-*H*<sup>3,3''</sup>), 8.34-8.33 (d, 2H, *J* = 5.0, *H*<sup>c</sup>), 8.09-8.07 (d, 4H, *J* = 10.0, Ar-*H*<sup>f</sup>), 7.94-7.90 (m, 4H, Tpy-*H*<sup>4,4''</sup>), 7.89-7.87 (d, 4H, *J* = 10.0, Ar-*H*<sup>e</sup>), 7.83-7.81 (d, 2H, *J* = 10.0, *H*<sup>a</sup>), 7.72-8.71 (d, 2H, *J* = 5.0, *H*<sup>b</sup>), 7.41-7.38 (m, 4H, Tpy-*H*<sup>5,5''</sup>); <sup>13</sup>C-NMR(125MHz, ppm, CDCl<sub>3</sub>): 156.35, 156.05, 149.80, 149.18, 141.75, 139.40, 138.60, 137.40, 137.25, 136.75, 136.20, 127.90, 126.36, 123.84, 123.30, 121.42, 120.17, 118.77; LC-MS: 783.6 [M+H] (Calcd. 783.9). m.p. 147-150 °C.

**[Ru(1)<sub>2</sub>Cl<sub>2</sub>] (D3):** To a stirred solution of **L1** (487 mg, 0.61 mmol) in CHCl<sub>3</sub> (80 mL), a solution of RuCl<sub>3</sub>·3H<sub>2</sub>O (78.4 mg, 0.3 mmol) in MeOH (80 mL) was added by dropwise. After refluxing for 48 h, the solvent was evaporated *in vacuo* and the residue was column chromatographed (Al<sub>2</sub>O<sub>3</sub>) eluting with CH<sub>2</sub>Cl<sub>2</sub>/MeOH to give the **D3**, as a red powder; Yield: 106 mg (20%); <sup>1</sup>H-NMR(500MHz, ppm, CDCl<sub>3</sub>: MeOH= 1:1): δ 9.29 (s, 4H, Tpy-*H*<sub>A</sub><sup>3',5'</sup>), 8.92-8.90 (d, *J* = 10.0 Hz, 4H, Tpy-*H*<sub>A</sub><sup>3,3''</sup>), 8.75 (s, 4H, Tpy-*H*<sub>B</sub><sup>3',5'</sup>), 8.72-8.66 (m, 12H, *H*<sup>c</sup>, *H*<sup>g</sup>, Tpy-*H*<sub>B</sub><sup>3,3''</sup>, Tpy-*H*<sub>B</sub><sup>6,6''</sup>), 8.43-8.42 (d, *J* = 5.0 Hz, 4H, Ar-*H*<sup>i</sup>), 8.20-8.18 (d, *J* = 10.0 Hz, 4H, Ar-*H*<sup>h</sup>), 8.10-8.04 (m, 8H, Tpy-*H*<sup>4,4''</sup>), 7.96-7.94 (d, *J* = 10.0 Hz, 2H, *H*<sup>e</sup>), 7.90-7.89 (d, *J* = 5.0 Hz, 2H, *H*<sup>f</sup>), 7.51-7.50 (d, *J* = 5.0 Hz, 4H, Tpy-*H*<sub>A</sub><sup>6,6''</sup>), 7.49-7.47 (t, *J* = 10.0 Hz, 4H, Tpy-*H*<sub>B</sub><sup>5,5''</sup>), 7.36-7.33 (d, *J* = 15.0 Hz, 4H, Tpy-*H*<sub>A</sub><sup>5,5''</sup>); <sup>13</sup>C-NMR of **3** cannot get due to its poor solubility. m.p. > 300 °C. ESI-TOF-MS (m/z): +3(m/z 566.5 [M-2Cl+H]<sup>3+</sup>) (Calcd. 566.5), +2(m/z 849.2 [M-2Cl]<sup>2+</sup>) (Calcd. 849.2).

**[Ru(2)<sub>2</sub>Cl<sub>2</sub>] (D4):** The synthesis of compound 4 is the same as compound 3. **L1** (477 mg, 0.61 mmol) in CHCl<sub>3</sub> (80 mL), RuCl<sub>3</sub>·3H<sub>2</sub>O (78.4 mg, 0.3 mmol) in MeOH (80 mL); Yield: 120 mg (23%); <sup>1</sup>H-NMR(500MHz, ppm, CDCl<sub>3</sub>): δ 9.54 (s, 4H, Tpy-*H*<sub>A</sub><sup>3',5'</sup>), 9.29-9.27 (d, *J* = 10.0 Hz, 4H, Tpy-*H*<sub>A</sub><sup>3,3''</sup>), 8.87 (s, 4H, Tpy-*H*<sub>B</sub><sup>3',5'</sup>), 8.79-8.78 (d, *J* = 5.0 Hz, 4H, Tpy-*H*<sub>B</sub><sup>6,6''</sup>), 8.74-8.72 (d, *J* = 10.0 Hz, 4H, Tpy-*H*<sub>B</sub><sup>3,3''</sup>), 8.70-8.67 (d, *J* = 15.0 Hz, 4H, Ar-*H*<sup>i</sup>), 8.39 (s, 2H, *H*<sup>c</sup>), 8.35 (s, 2H, *H*<sup>g</sup>), 8.12-8.10 (m, 8H, Ar-*H*<sup>h</sup>, Ar-*H*<sup>k</sup>), 8.03-8.01 (t, *J* = 10.0 Hz, 4H, *H*<sub>A</sub><sup>4,4''</sup>), 7.95-7.85 (m, 12H, Ar-*H*<sup>j</sup>, Tpy-*H*<sub>B</sub><sup>4,4''</sup>, *H*<sup>a</sup>, *H*<sup>e</sup>), 7.76 (s, 2H, *H*<sup>b</sup>), 7.74 (s, 2H, *H*<sup>f</sup>), 7.46-7.45 (d, *J* = 5.0 Hz, 4H, Tpy-*H*<sub>A</sub><sup>6,6''</sup>), 7.40-7.39 (t, *J* = 5.0 Hz, 4H, Tpy-*H*<sub>B</sub><sup>5,5''</sup>), 7.33-7.31 (t, *J* = 10.0 Hz, 4H, Tpy-*H*<sub>A</sub><sup>5,5''</sup>); <sup>13</sup>C-NMR of **4** cannot get due to its poor solubility. m.p. > 300 °C. ESI-TOF-MS (m/z): +4(m/z 417.1 [M-2Cl+2H]<sup>4+</sup>) (Calcd. 417.1), +3(m/z 555.8 [M-2Cl+H]<sup>3+</sup>) (Calcd. 555.8), +2(m/z 833.2 [M-2Cl]<sup>2+</sup>) (Calcd. 833.2).

**([Ru<sub>2</sub>Fe<sub>2</sub>(1)<sub>4</sub>(PF<sub>6</sub>)<sub>8</sub>]) (T5):** To a stirred solution of **D3** (17.4 mg, 10 μmol) in MeOH (100 mL), a solution of FeCl<sub>2</sub>·4H<sub>2</sub>O (2 mg, 10 μmol) in MeOH (10 mL) was slowly added. After refluxing for 18 h, excess NH<sub>4</sub>PF<sub>6</sub> was added, generating a red precipitate, which was filtered and washed with MeOH and then water to give the desired **T5** possessing PF<sub>6</sub><sup>-</sup> as counterions; Yield: 22 mg (96%); <sup>1</sup>H-NMR(500MHz,

ppm, CD<sub>3</sub>CN):  $\delta$  9.35 (s, 8H, Tpy-*H<sub>B</sub><sup>3',5'</sup>*), 9.18 (s, 8H, Tpy-*H<sub>A</sub><sup>3',5'</sup>*), 8.59-8.57 (d,  $J$  = 10.0 Hz, 8H, Ar-*H<sup>i</sup>*), 8.48-8.47 (d,  $J$  = 5.0 Hz, 8H, Ar-*H<sup>k</sup>*), 8.39-8.37 (d,  $J$  = 10.0 Hz, 8H, Ar-*H<sup>j</sup>*), 8.35-8.33 (d,  $J$  = 10.0 Hz, 8H, Ar-*H<sup>l</sup>*), 8.27-8.24 (m, 8H, *H<sup>a</sup>*, *H<sup>b</sup>*), 8.15-8.12 (m, 8H, *H<sup>e</sup>*, *H<sup>f</sup>*), 8.01-7.96 (m, 16H, Tpy-*H<sub>A</sub><sup>4,4''</sup>*, Tpy-*H<sub>B</sub><sup>4,4''</sup>*), 7.53-7.52 (d, 8H, Tpy-*H<sub>A</sub><sup>6,6''</sup>*), 7.28-7.25 (m, 16H, Tpy-*H<sub>B</sub><sup>6,6''</sup>*, Tpy-*H<sub>A</sub><sup>6,6''</sup>*), 7.15 (s, 8H, Tpy-*H<sub>B</sub><sup>5,5''</sup>*). ESI-TOF-MS( $m/z$ ): +8 ( $m/z$  438.21), +7 ( $m/z$  521.9673), +6 ( $m/z$  633.2730), +5 ( $m/z$  788.92), +4 ( $m/z$  1022.39) and +3 ( $m/z$  1401.22).

**[Ru<sub>2</sub>Fe<sub>2</sub>(2)<sub>4</sub>(PF<sub>6</sub>)<sub>8</sub>] (T6):** To a stirred solution of **D4** (17.7 mg, 10  $\mu$ mol) in MeOH (100 mL), a solution of FeCl<sub>2</sub>·4H<sub>2</sub>O (2 mg, 10  $\mu$ mol) in MeOH (10 mL) was slowly added. After refluxing for 18 h, excess NH<sub>4</sub>PF<sub>6</sub> was added, generating a red precipitate, which was filtered and washed with MeOH and then water to give the desired **T6** possessing PF<sub>6</sub><sup>−</sup> as counterions; Yield: 21.7 mg (94%); <sup>1</sup>H-NMR(500MHz, ppm, CD<sub>3</sub>CN) of:  $\delta$  9.33 (s, 8H, Tpy-*H<sub>B</sub><sup>3',5'</sup>*), 9.16 (s, 8H, Tpy-*H<sub>A</sub><sup>3',5'</sup>*), 8.76-8.71 (m, 24H, Tpy-*H<sub>A</sub><sup>3',5'</sup>*, Tpy-*H<sub>A</sub><sup>3',5'</sup>*, *H<sup>c</sup>*, *H<sup>g</sup>*), 8.56-8.54 (d,  $J$  = 10.0 Hz, 8H, Ar-*H<sup>i</sup>*), 8.45-8.43 (d,  $J$  = 10.0 Hz, 8H, Ar-*H<sup>k</sup>*), 8.30-8.28 (d,  $J$  = 10.0 Hz, 8H, Ar-*H<sup>h</sup>*), 8.26-8.24 (d,  $J$  = 10.0 Hz, 8H, Ar-*H<sup>l</sup>*), 8.15-8.11 (t, 8H, *H<sup>a</sup>*, *H<sup>e</sup>*), 8.03-7.93 (m, 24H, Tpy-*H<sub>A</sub><sup>4,4''</sup>*, Tpy-*H<sub>B</sub><sup>4,4''</sup>*, *H<sup>b</sup>*, *H<sup>f</sup>*), 7.53-7.52 (d,  $J$  = 10.0 Hz, 8H, Tpy-*H<sub>A</sub><sup>6,6''</sup>*), 7.29-7.28 (d, 8H, Tpy-*H<sub>B</sub><sup>6,6''</sup>*), 7.27-7.24 (t, 8H, Tpy-*H<sub>A</sub><sup>5,5''</sup>*), 7.17-7.14 (t, 8H, Tpy-*H<sub>B</sub><sup>5,5''</sup>*). ESI-TOF-MS( $m/z$ ): +8( $m/z$  430.72), +7( $m/z$  512.97), +6( $m/z$  622.62), +5( $m/z$  776.14) +4( $m/z$  1006.41), +3( $m/z$  1390.21).

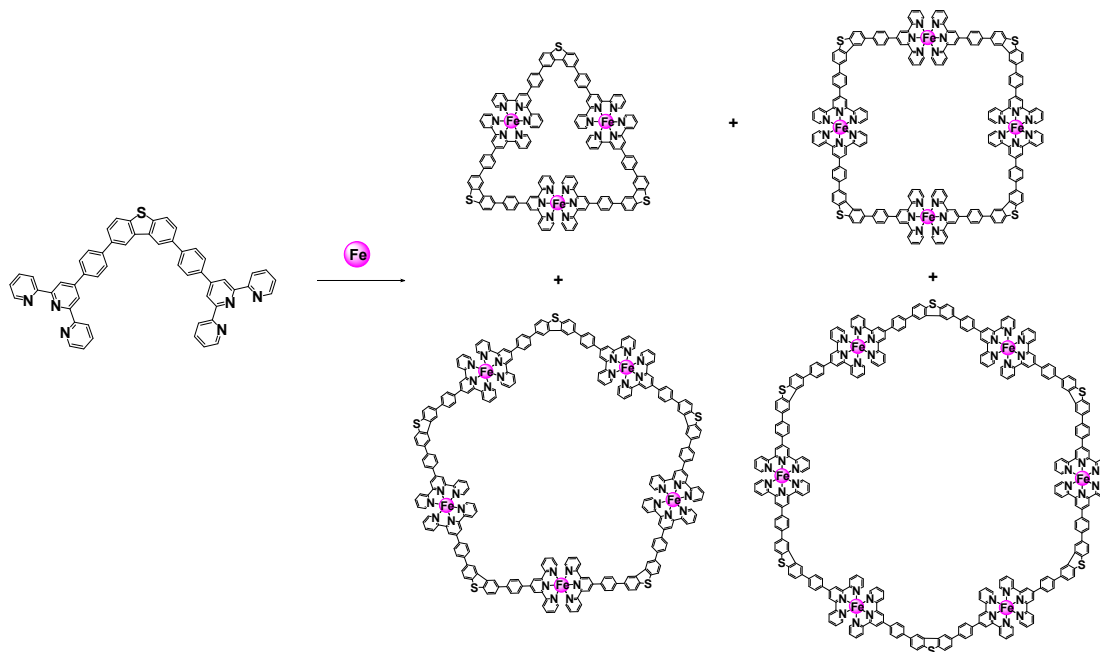

**L1+ Fe<sup>2+</sup>:** To a stirred solution of **L1** (8 mg, 10  $\mu$ mol) in CHCl<sub>3</sub> (3 mL), a solution of FeCl<sub>2</sub>·4H<sub>2</sub>O (2 mg, 10  $\mu$ mol) in MeOH (3 mL) was added. After refluxing for 18 h, excess NH<sub>4</sub>PF<sub>6</sub> was added, generating a purple precipitate, which was filtered and washed with MeOH and then water to give purple solid.

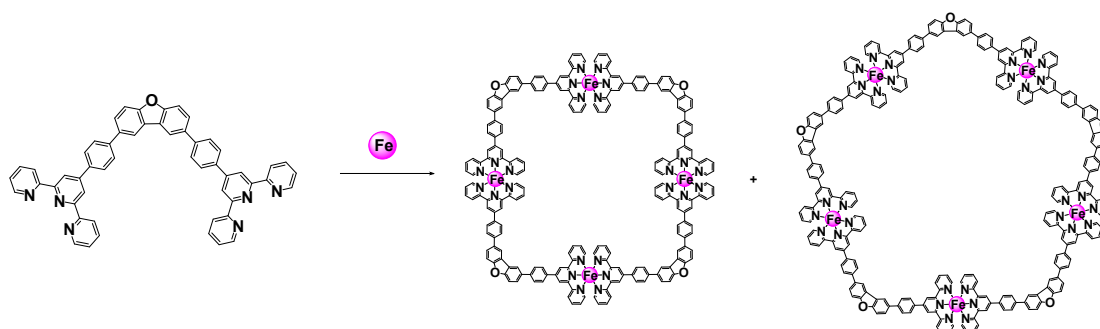

**L2+ Fe<sup>2+</sup>:** To a stirred solution of **L2** (7.8 mg, 10  $\mu$ mol) in CHCl<sub>3</sub> (3 mL), a solution of FeCl<sub>2</sub>·4H<sub>2</sub>O (2 mg, 10  $\mu$ mol) in MeOH (3 mL) was added. After refluxing for 18 h, excess NH<sub>4</sub>PF<sub>6</sub> was added, generating a purple precipitate, which was filtered and washed with MeOH and then water to give purple solid.

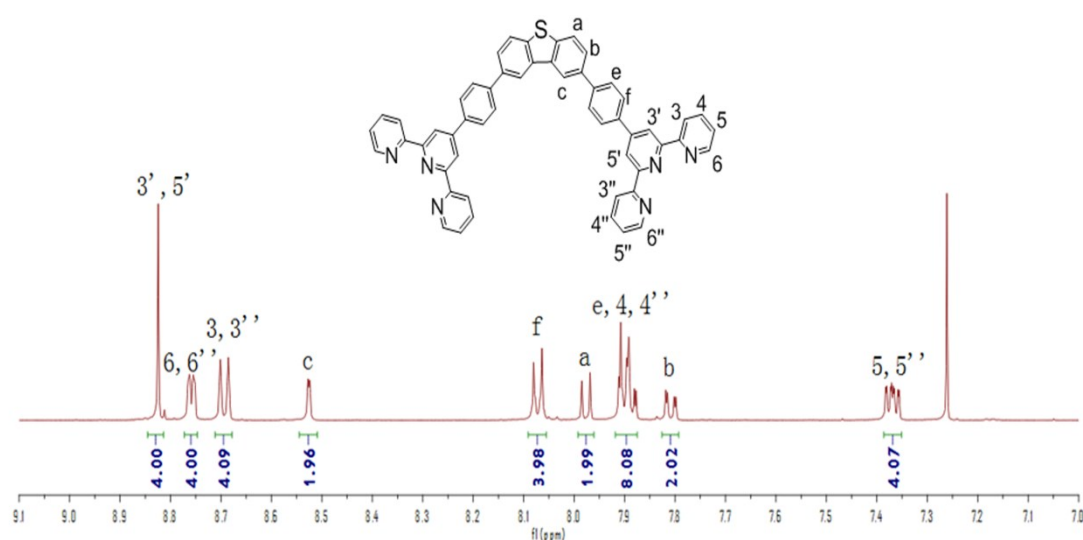

**Fig S1.** <sup>1</sup>H-NMR of **L1**.

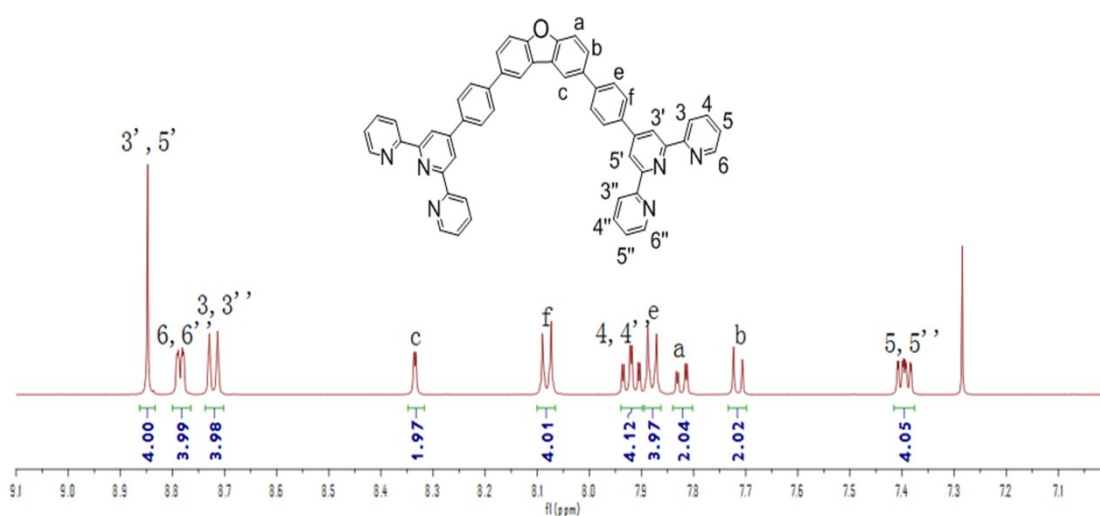

**Fig S2.** <sup>1</sup>H-NMR of **L2**.

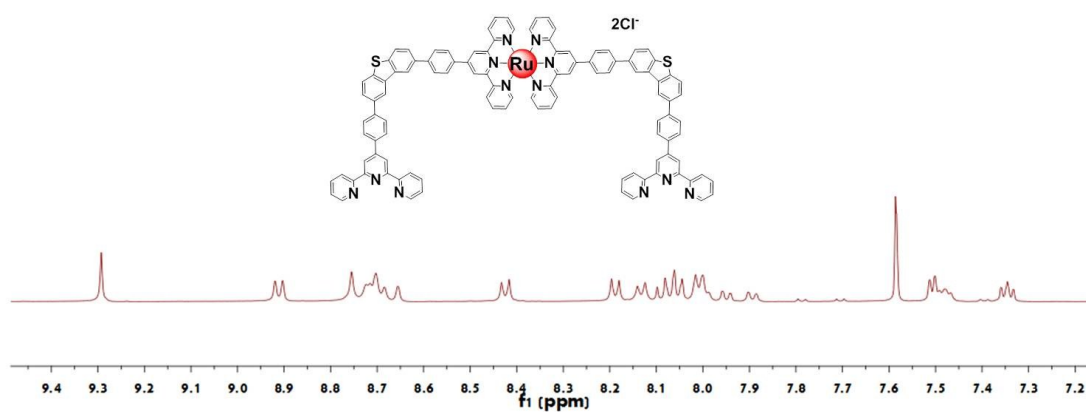

**Fig S3. <sup>1</sup>H-NMR of D3.**

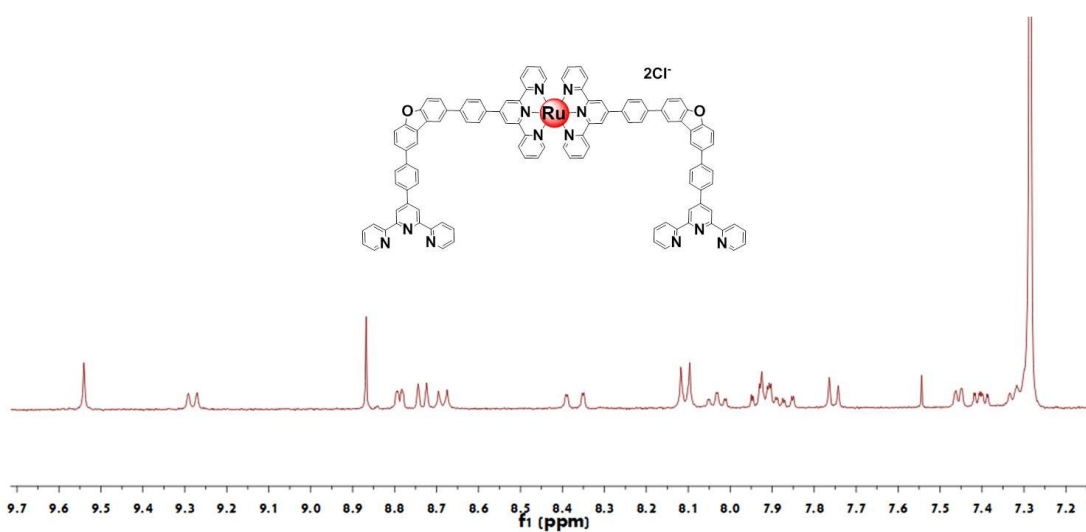

**Fig S4. <sup>1</sup>H-NMR of D4.**

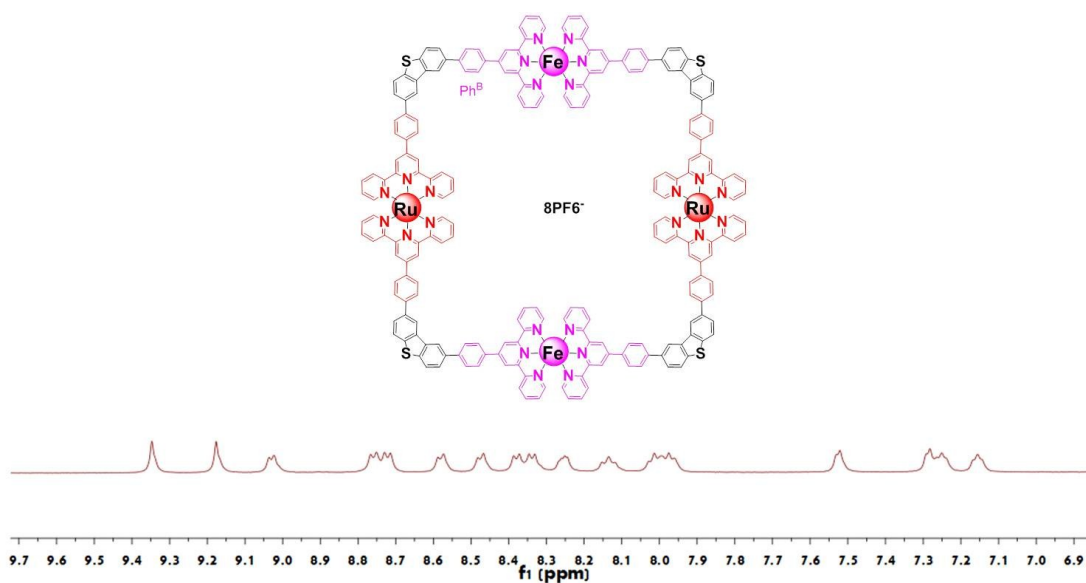

**Fig S5. <sup>1</sup>H-NMR of T5.**

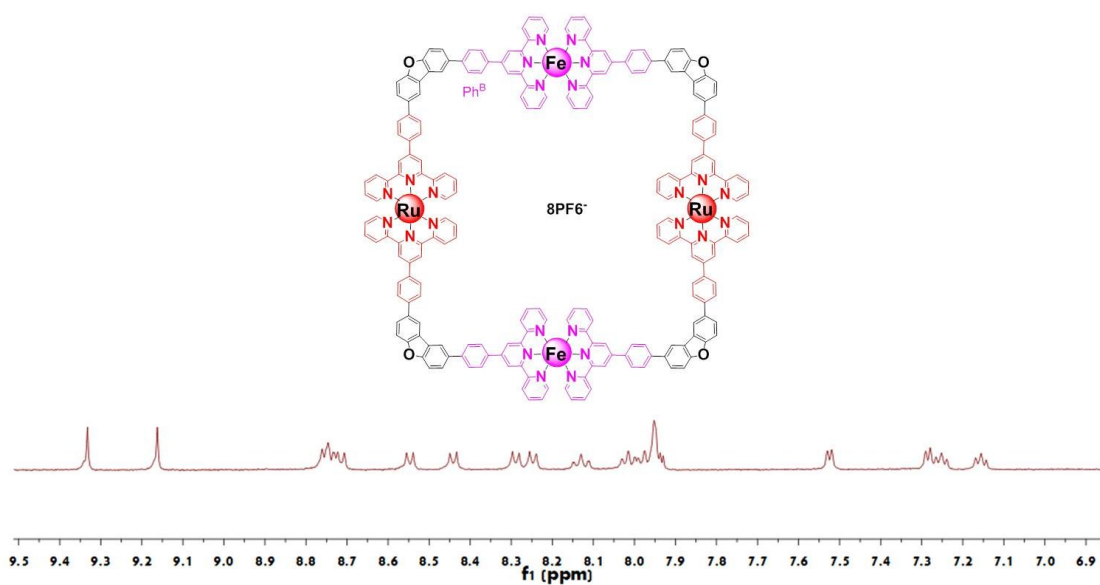

**Fig S6.** <sup>1</sup>H-NMR of T6.

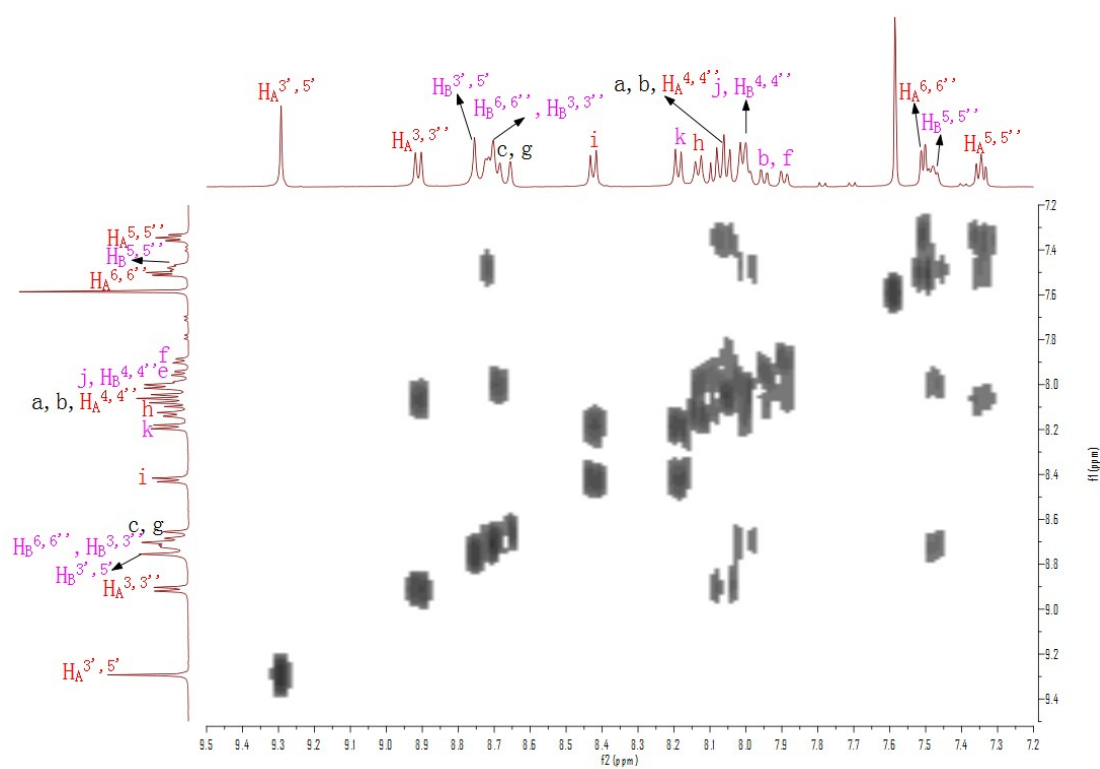

**Fig S7.** COSY-NMR of D3.

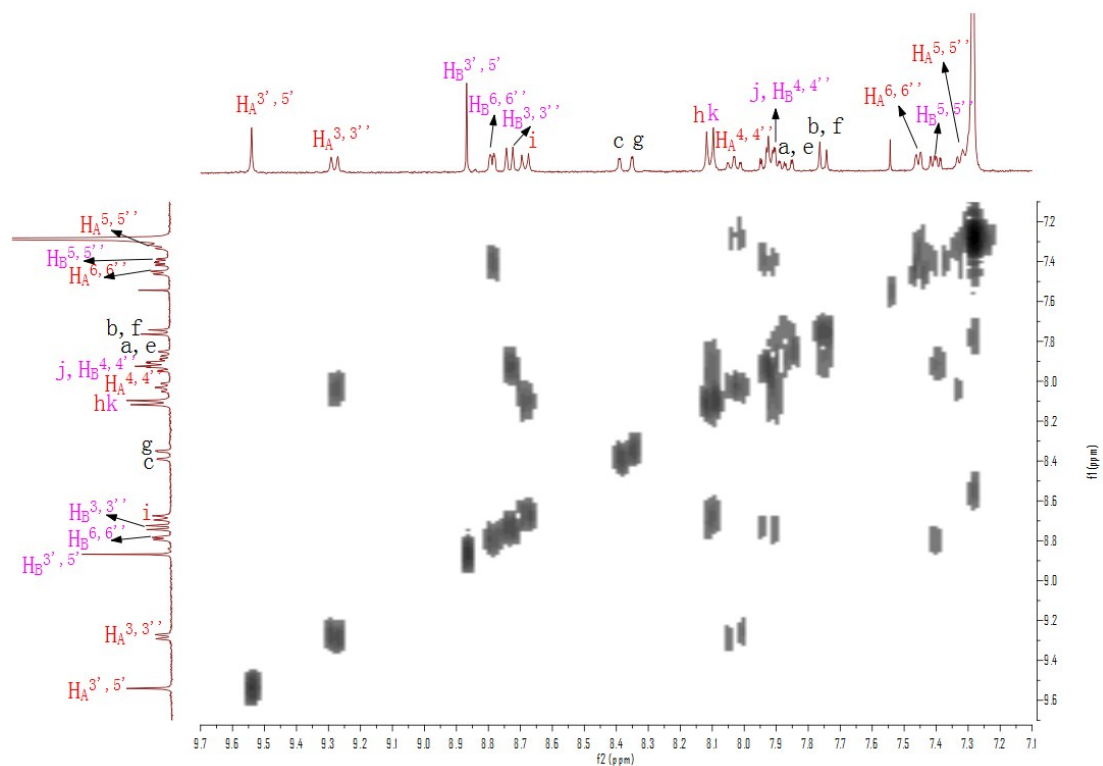

**Fig S8. COSY-NMR of D4.**

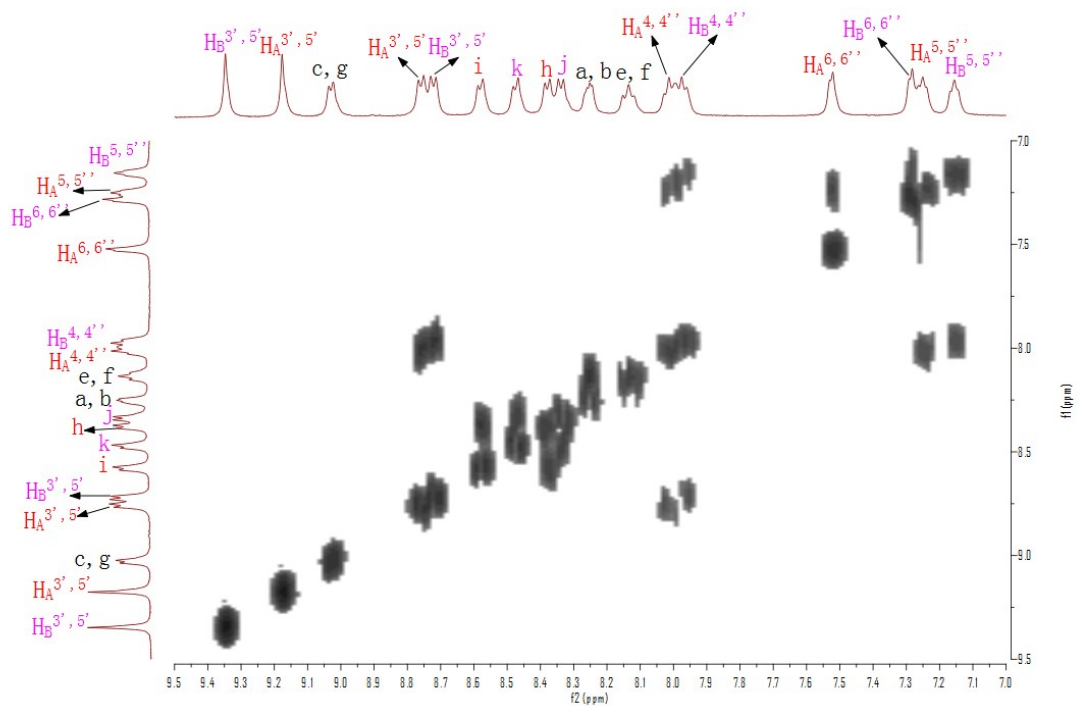

**Fig S9. COSY-NMR of T5.**



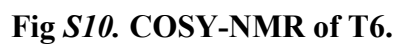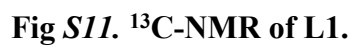

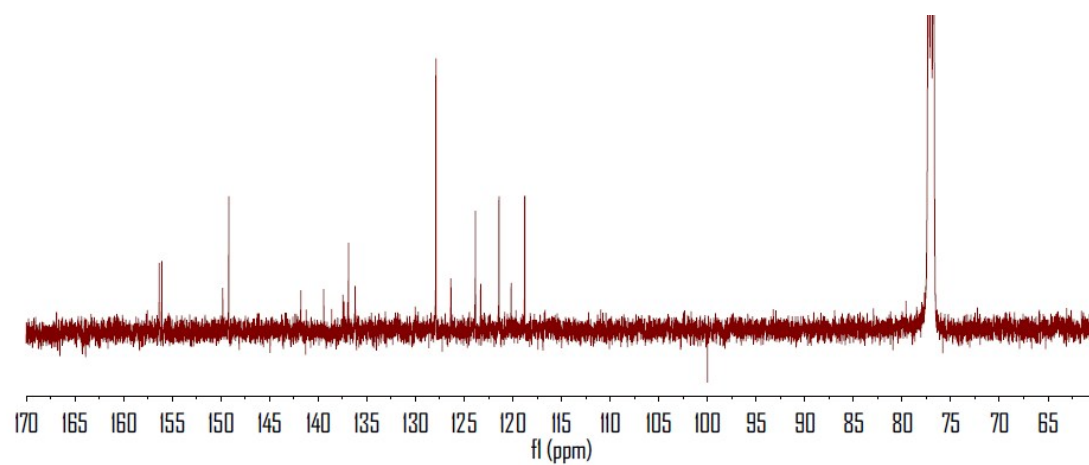

**Fig S12.**  $^{13}\text{C}$ -NMR of L2.

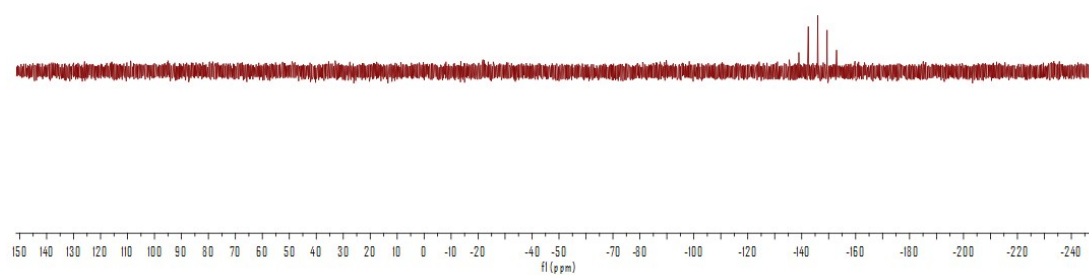

**Fig S13.**  $^{31}\text{P}$ -NMR of T5.

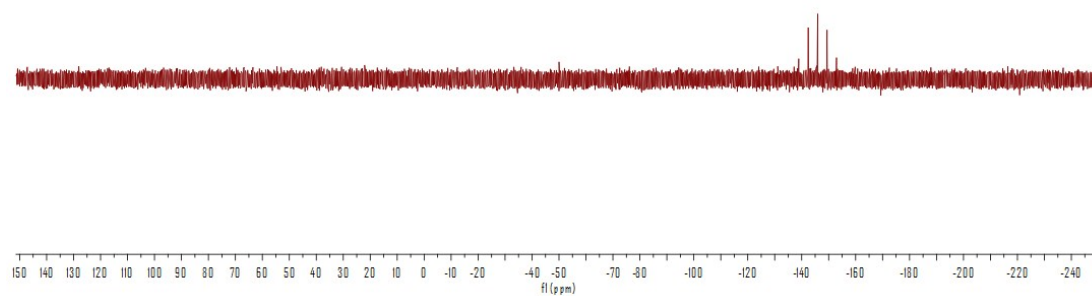

**Fig S14.** <sup>31</sup>P-NMR of T6.

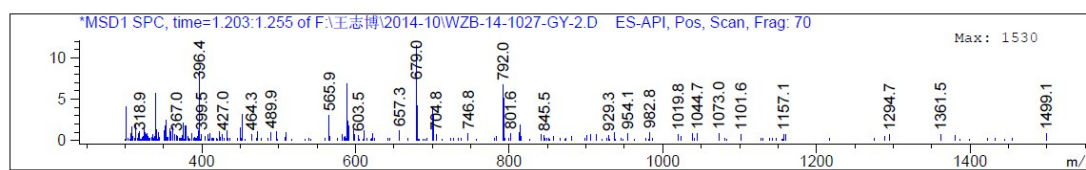

**Fig S15.** LC-MS of L1.

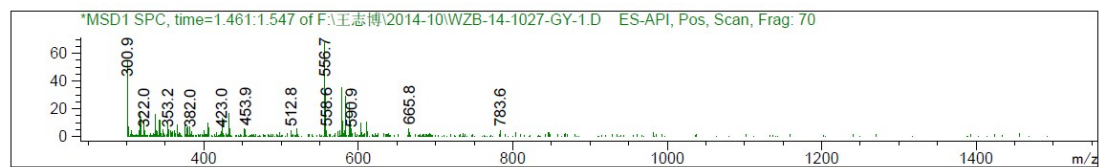

**Fig S16.** LC-MS of L2.

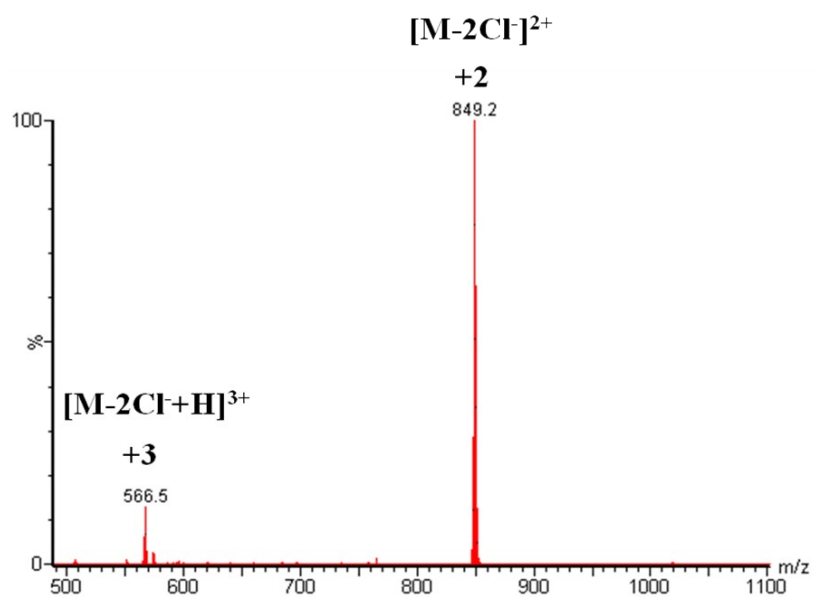

**Fig S17.** ESI-TOF-MS of D3.

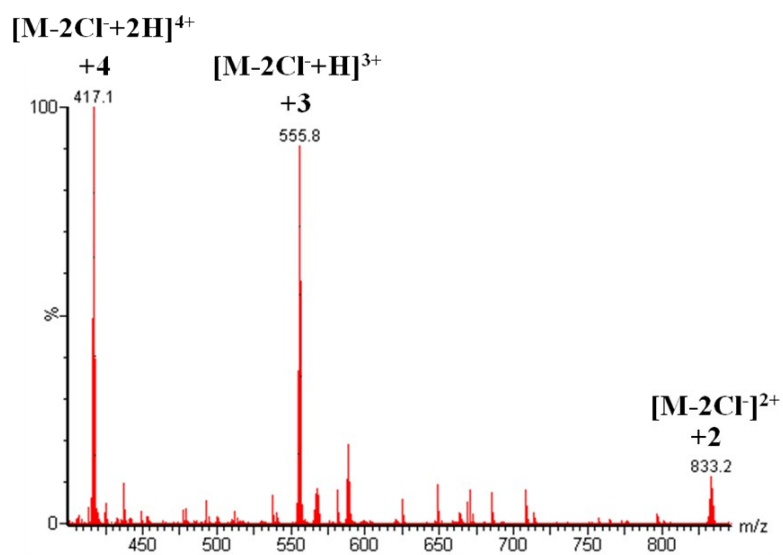

**Fig S18.** ESI-TOF-MS of D4.

## Isotopic Patterns (ESI-TOF-MS)

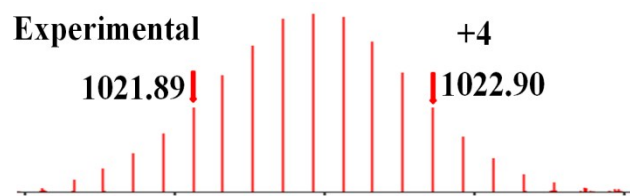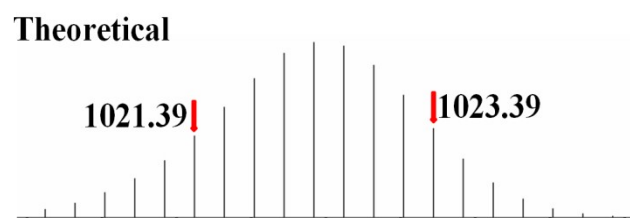

1020

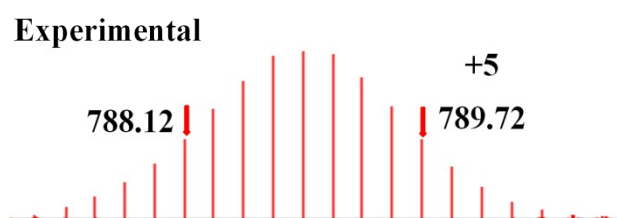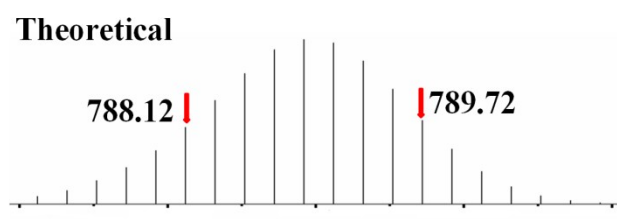

787

791

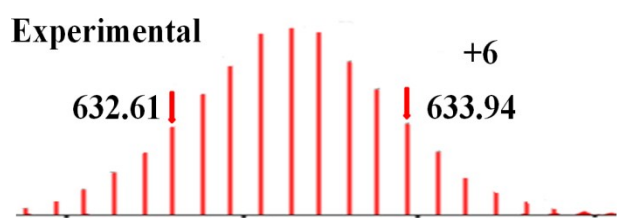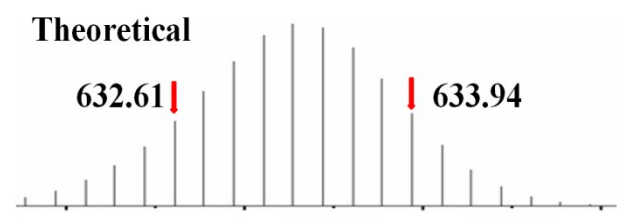

632

635

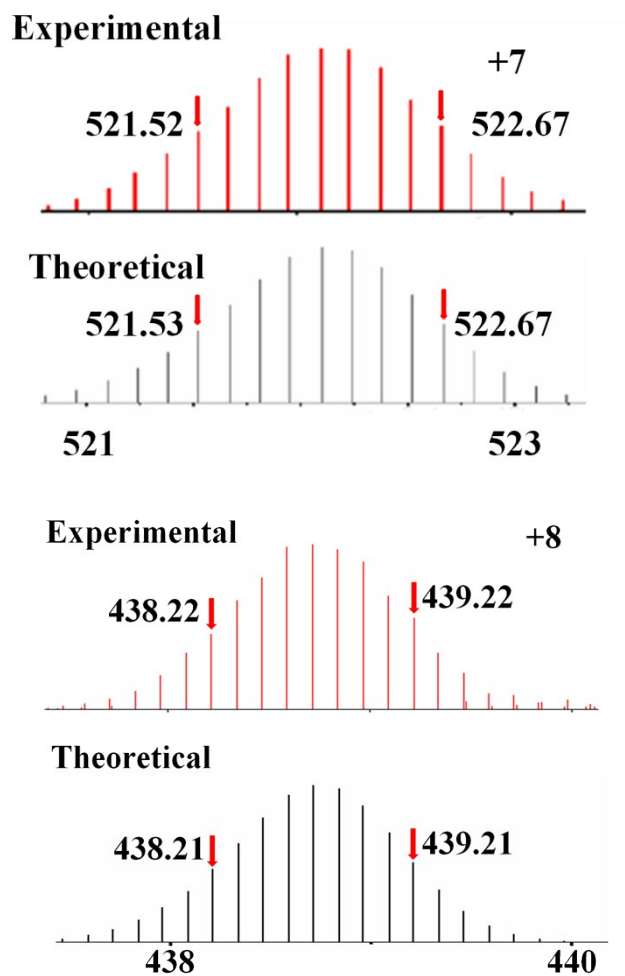

**Fig. S19.** Isotopic patterns for the different charge states (4+ to 8+) observed from **T5** ( $\text{PF}_6^-$  as counterion).

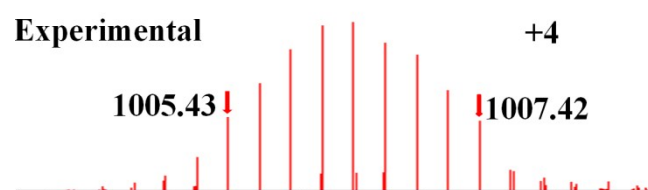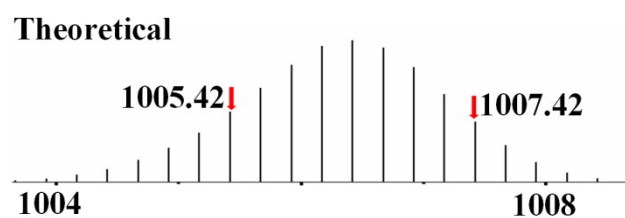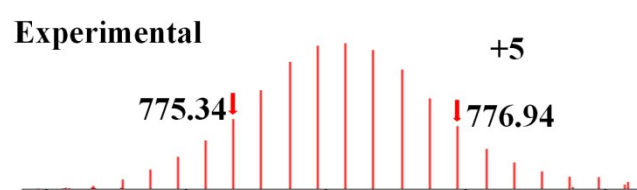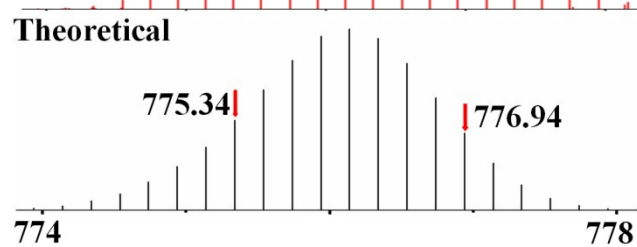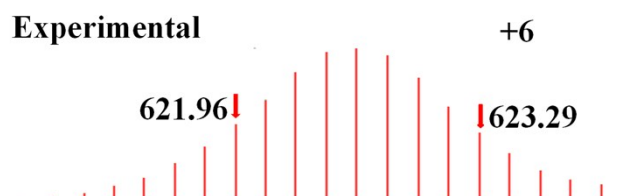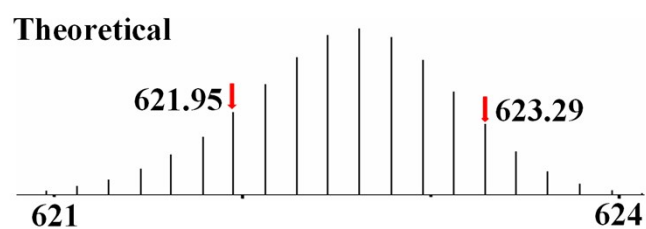

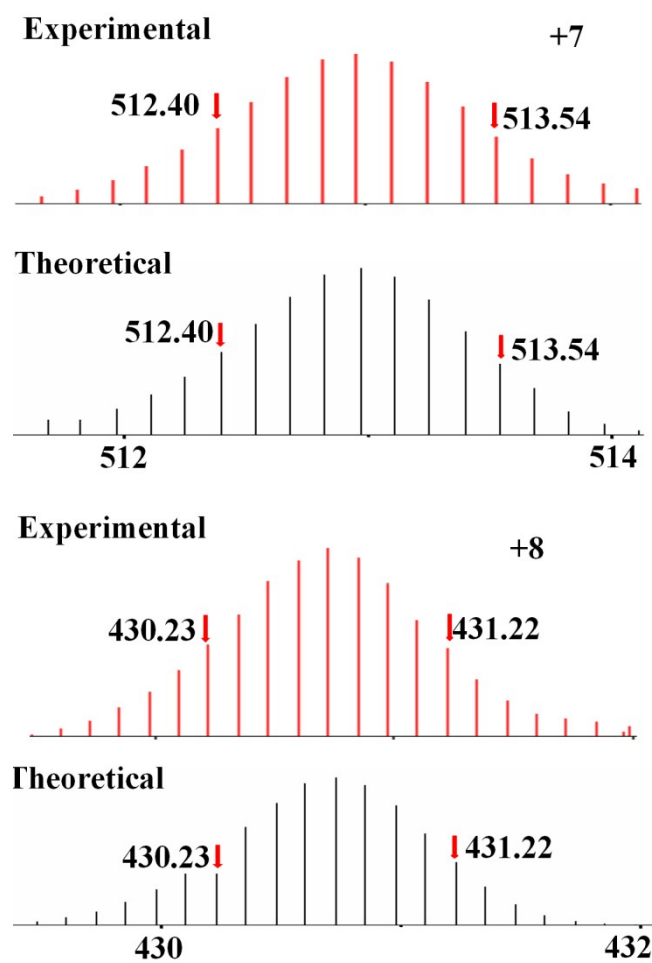

**Fig. S20.** Isotope patterns for the different charge states (4+ to 8+) observed from **T6** ( $\text{PF}_6^-$  as counterion).



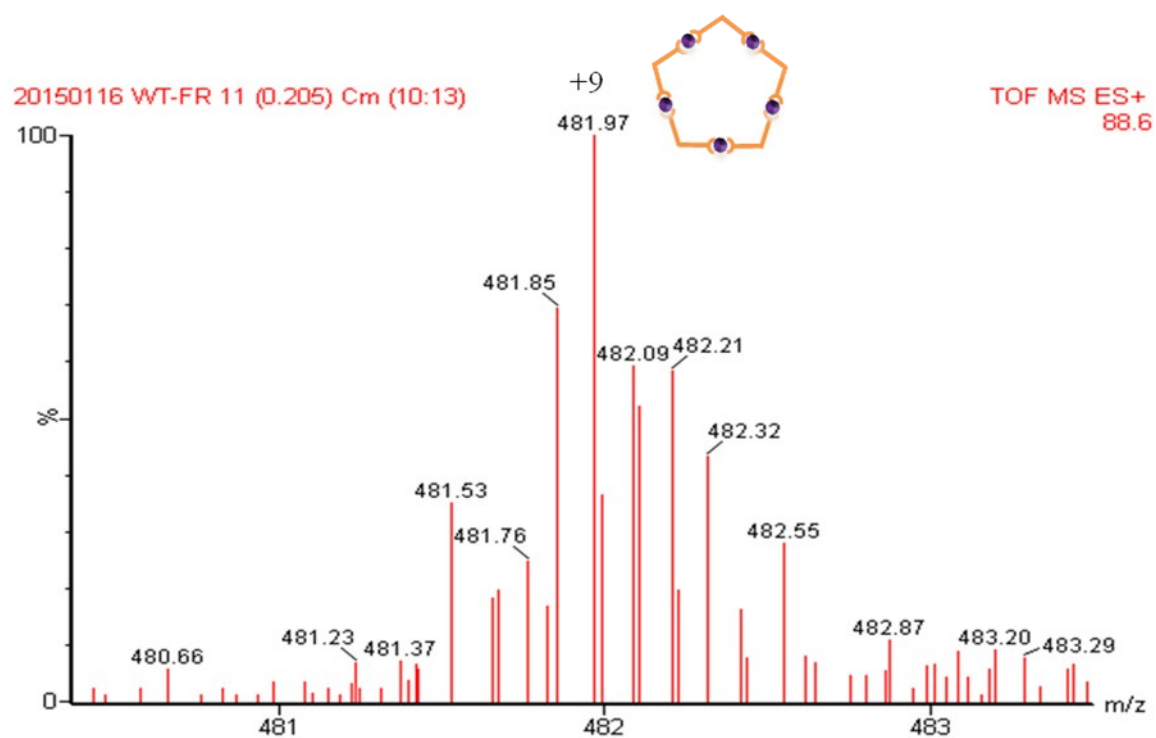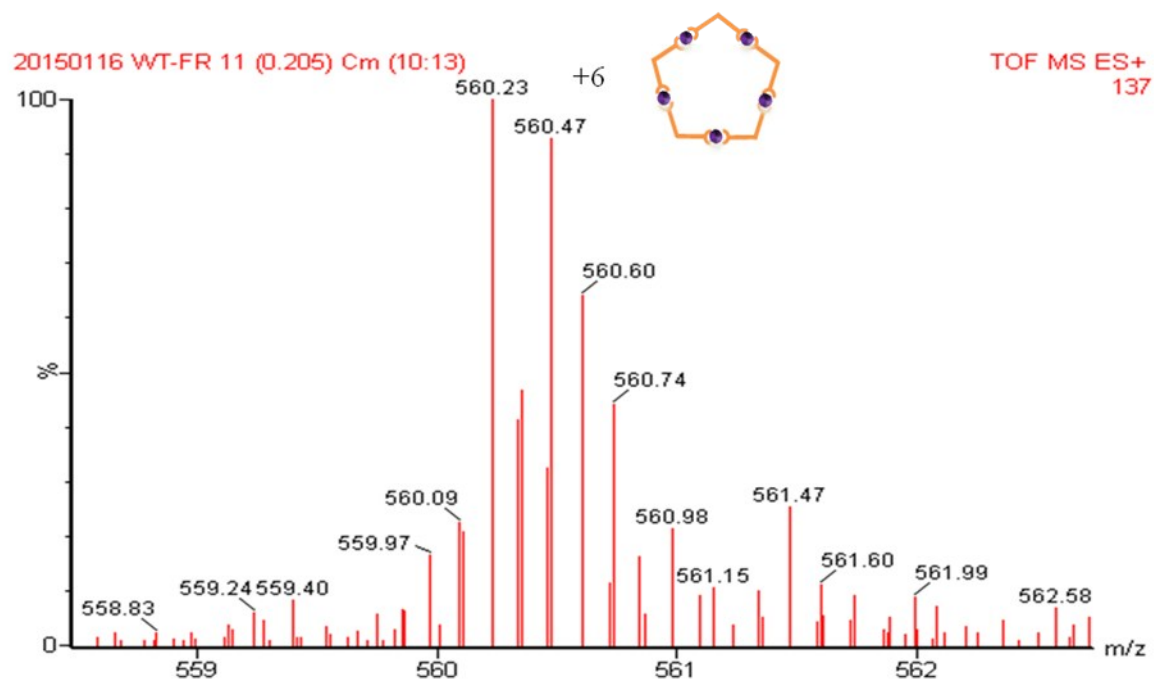

**Fig S21.** Partial isotopic patterns of ESI-TOF-MS spectra for  $[(\mathbf{L2Fe})_5]^{9+}$ , top, and  $[(\mathbf{L2Fe})_5]^{6+}$ , bottom, from self-assembly between **L2** and  $\text{Fe}^{2+}$ .

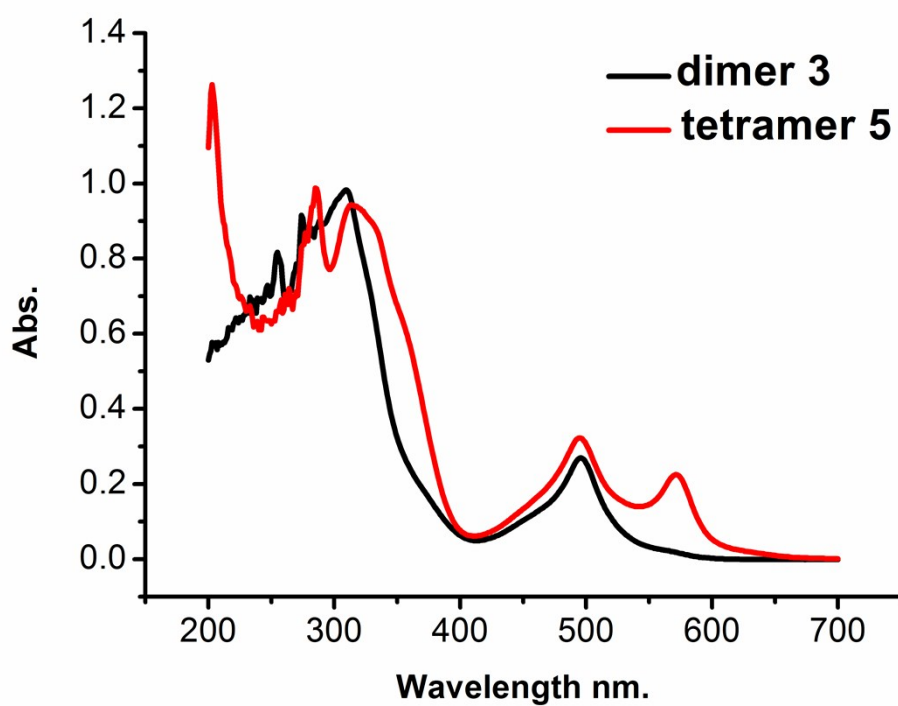

**Fig S22.** Full-figure of UV-vis spectra for dimer 3 and tetramer 5.

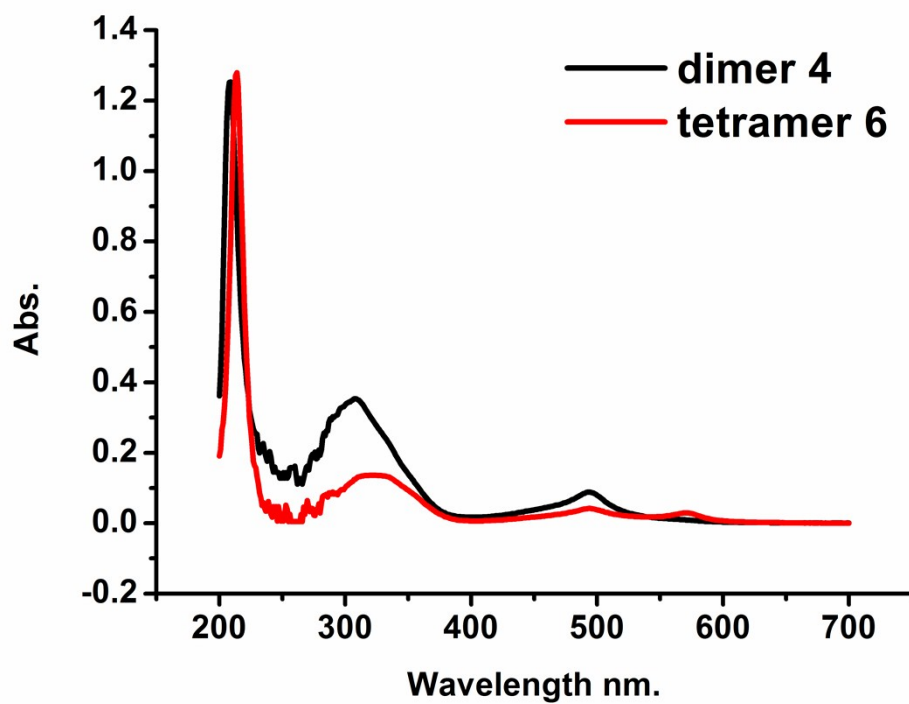

**Fig S23.** Full-figure of UV-vis spectra for dimer 4 and tetramer 6.

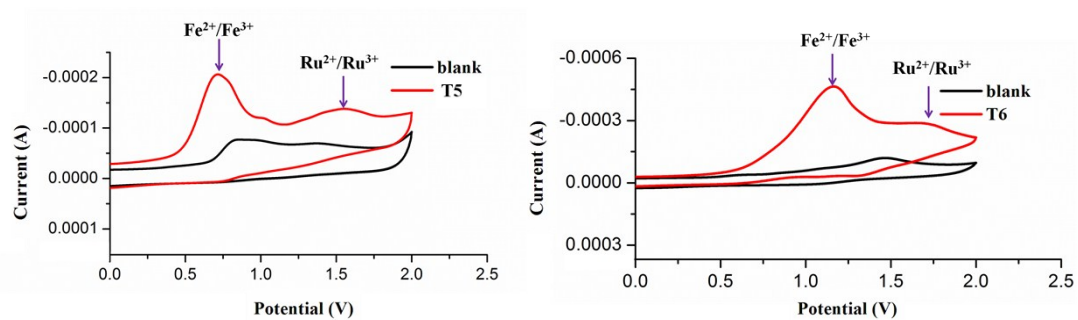

**Fig. S24.** Cyclic voltammograms of the complexes **T5** (Left), and **T6** (Right) (in 0.1 M Bu<sub>4</sub>NPF<sub>6</sub>, CH<sub>3</sub>CN solution).

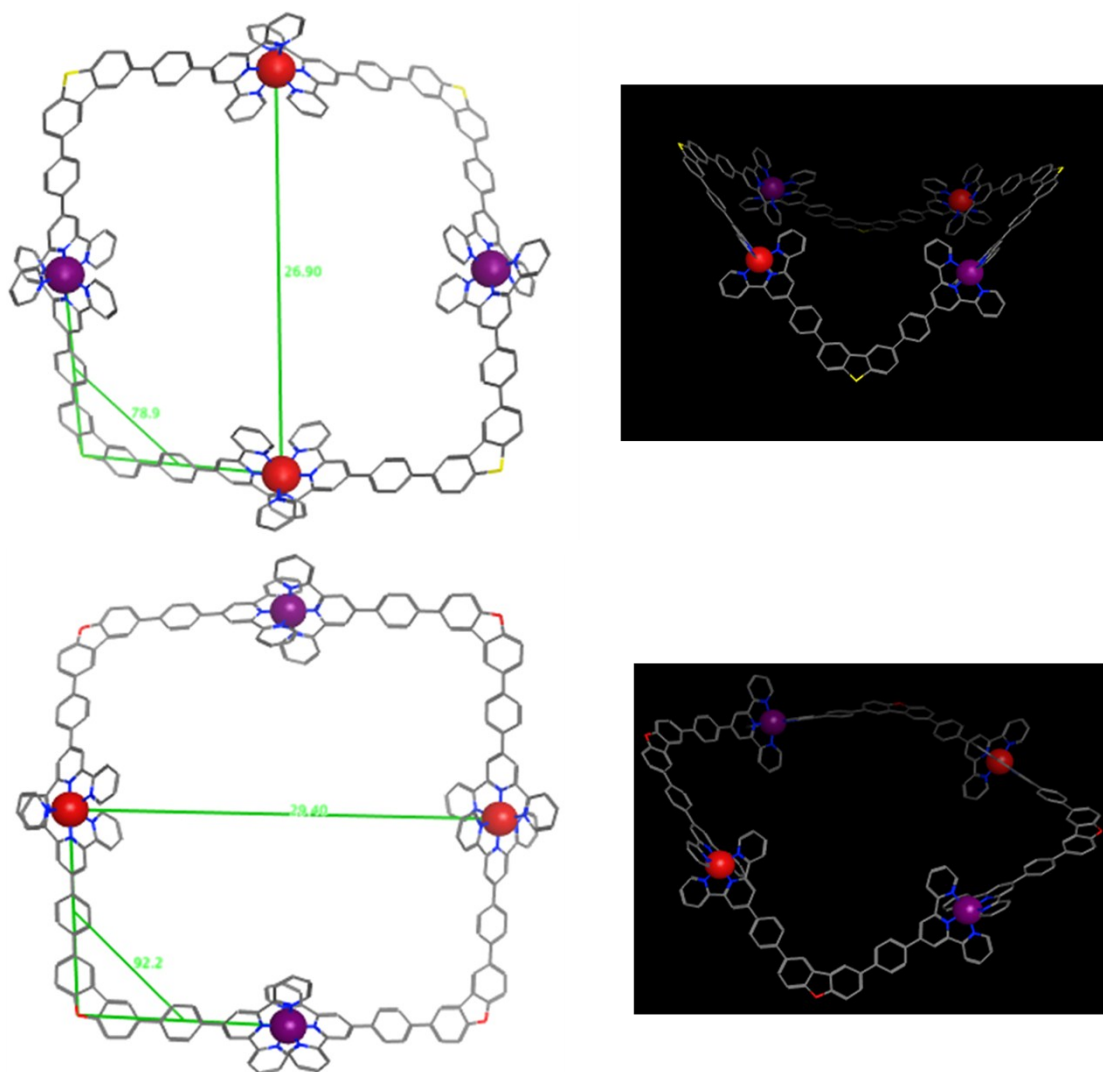

**Fig S25.** Energy-minimized structures from molecular modeling (MOE): **T5** (up), **T6** (bottom).

**References:**

1. Zhang, S. L.; Chen, R. F.; Jun, Y.; Feng, L.; Jiang, H. J.; Shi, N. E.; An, Z. F.; Ma, C.; Liu, B.; Huang, W. *Org. Lett.* 2010, **12**, 3438-3441.
2. Schultz, A.; Li, X. P.; Barkakaty, B.; Moorefield, C. N.; Wesdemiotis, C.; Newkome, G. R. *J. Am. Chem. Soc.* 2011, **133**, 11450–11453.
